# Supplementary material for: Co-Pyrolysis Behavior, Kinetic and Mechanism of Waste-Printed Circuit Board with Biomass
Source: MDPI journal article supplement (doi:10.3390/pr11010229), 2023-01-10
Supplement: s1 [file s1]

Archive with 1 entries (1 files):
- processes-2093605-supplementary.pdf
