# Supplementary material for: Co-Pyrolysis Behavior, Kinetic and Mechanism of Waste-Printed Circuit Board with Biomass
Source: MDPI journal article supplement (doi:10.3390/pr11010229), 2023-01-10
Supplement: s1 [file s1 › processes-2093605-supplementary.pdf]

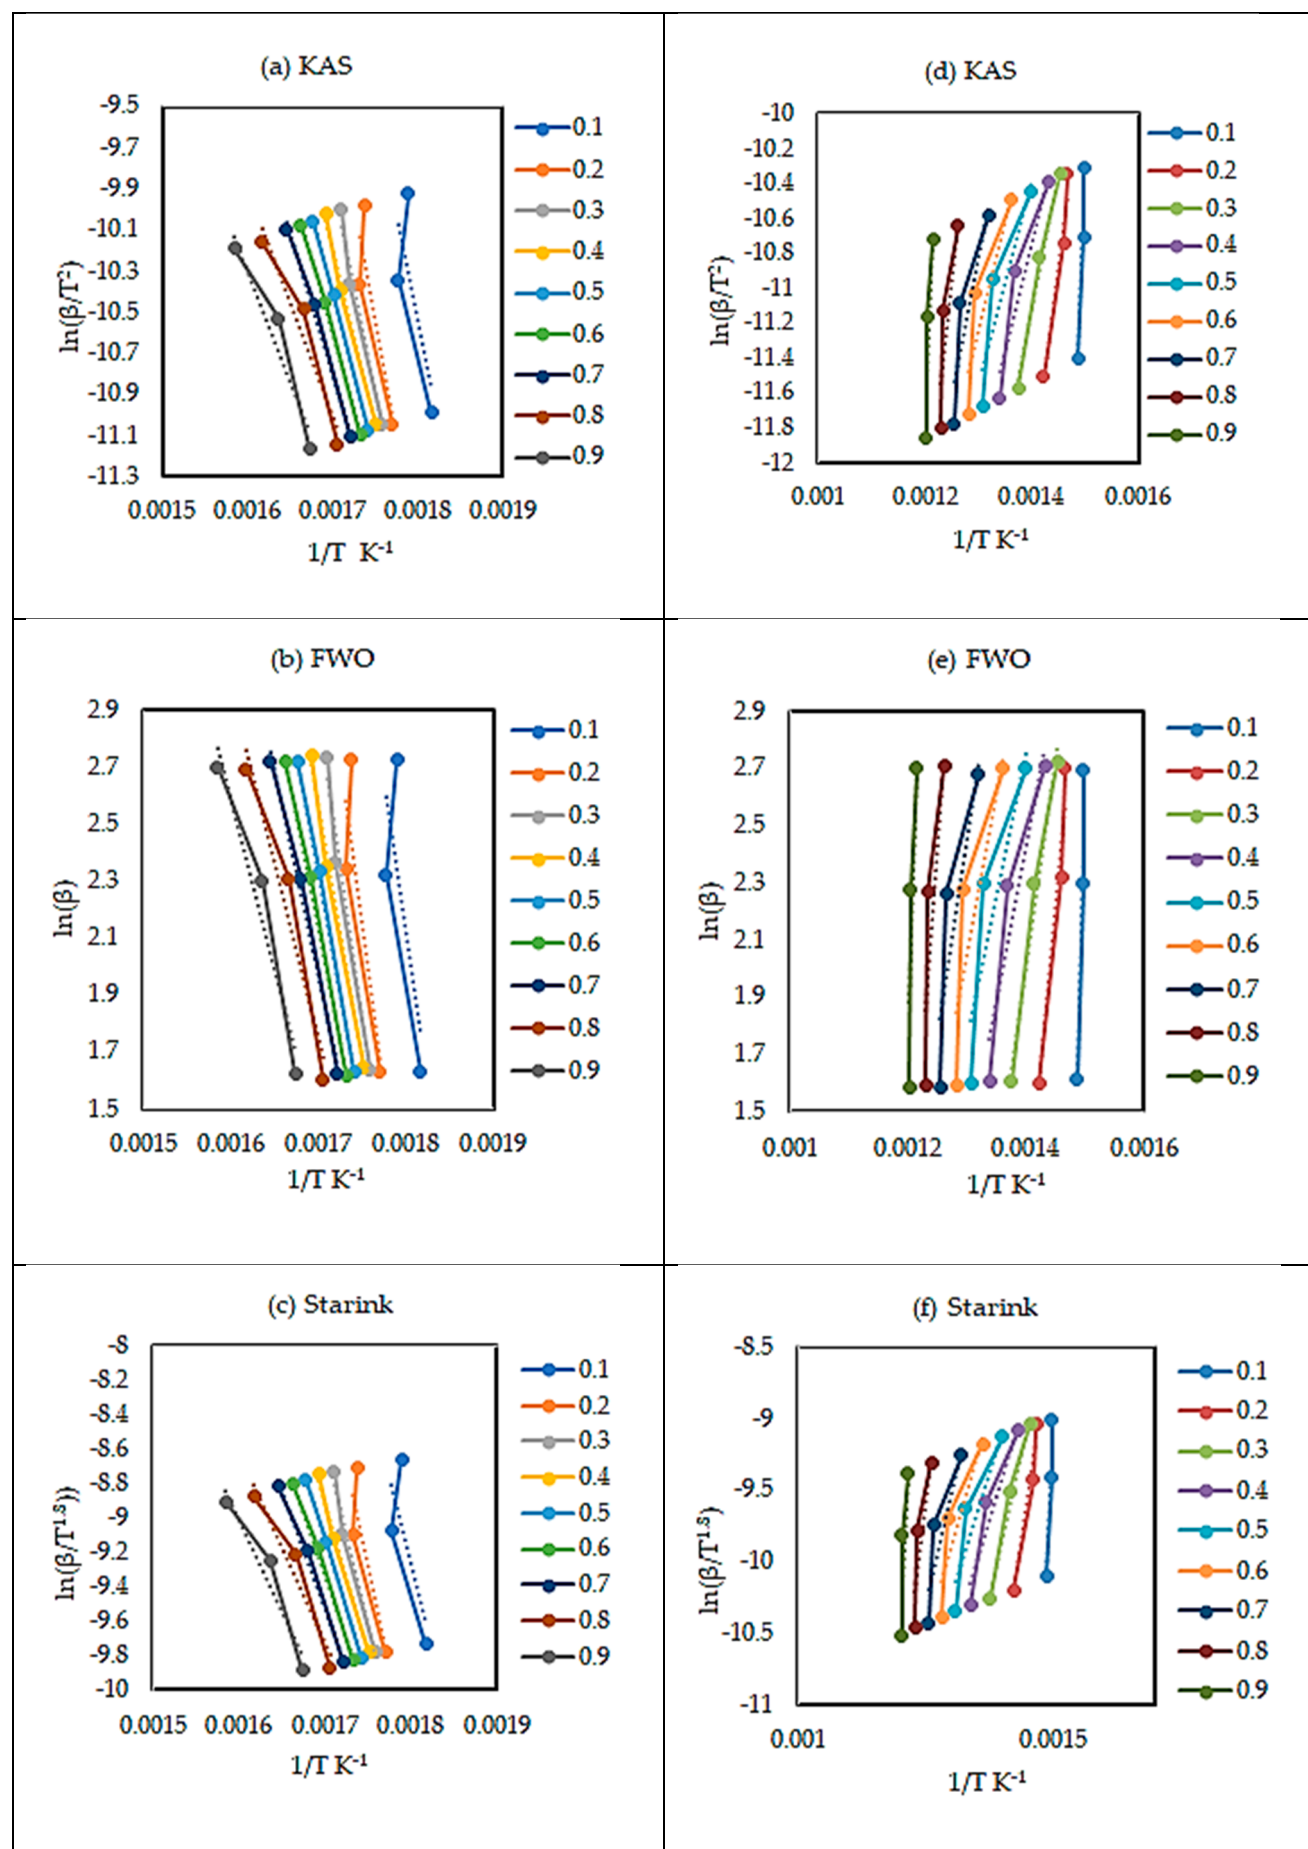

Figure S1. Curve fittings to kinetic model proposed by KAS, FWO and Starink for WPCBs 1<sup>st</sup> (a,b,c) and 2<sup>nd</sup> (d,e,f) Zone

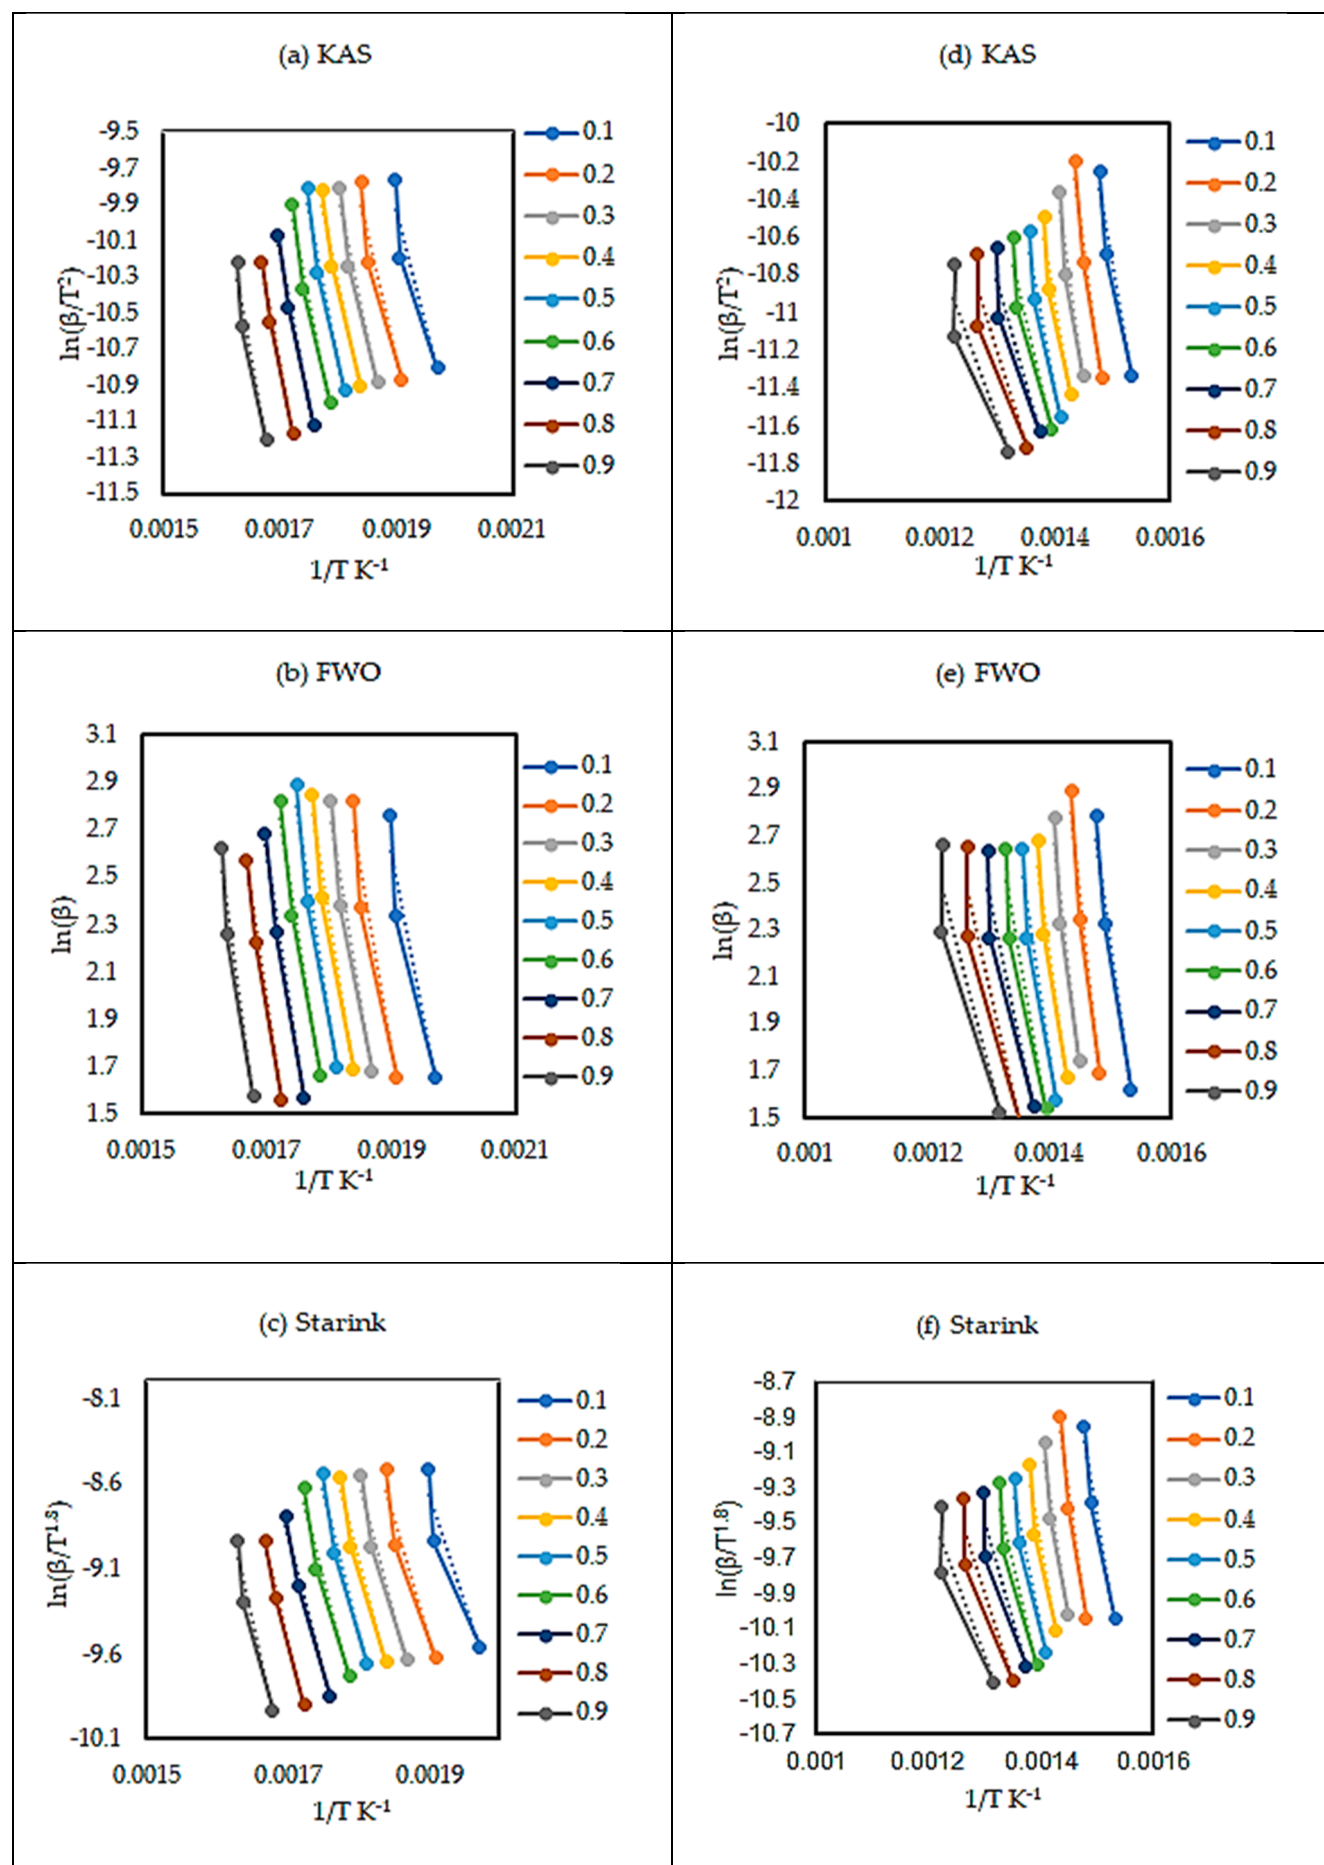

Figure. S2. Curve fittings to kinetic model proposed by KAS, FWO and Starink for CS 1<sup>st</sup> (a,b,c) and 2<sup>nd</sup> (d,e,f) Zone.

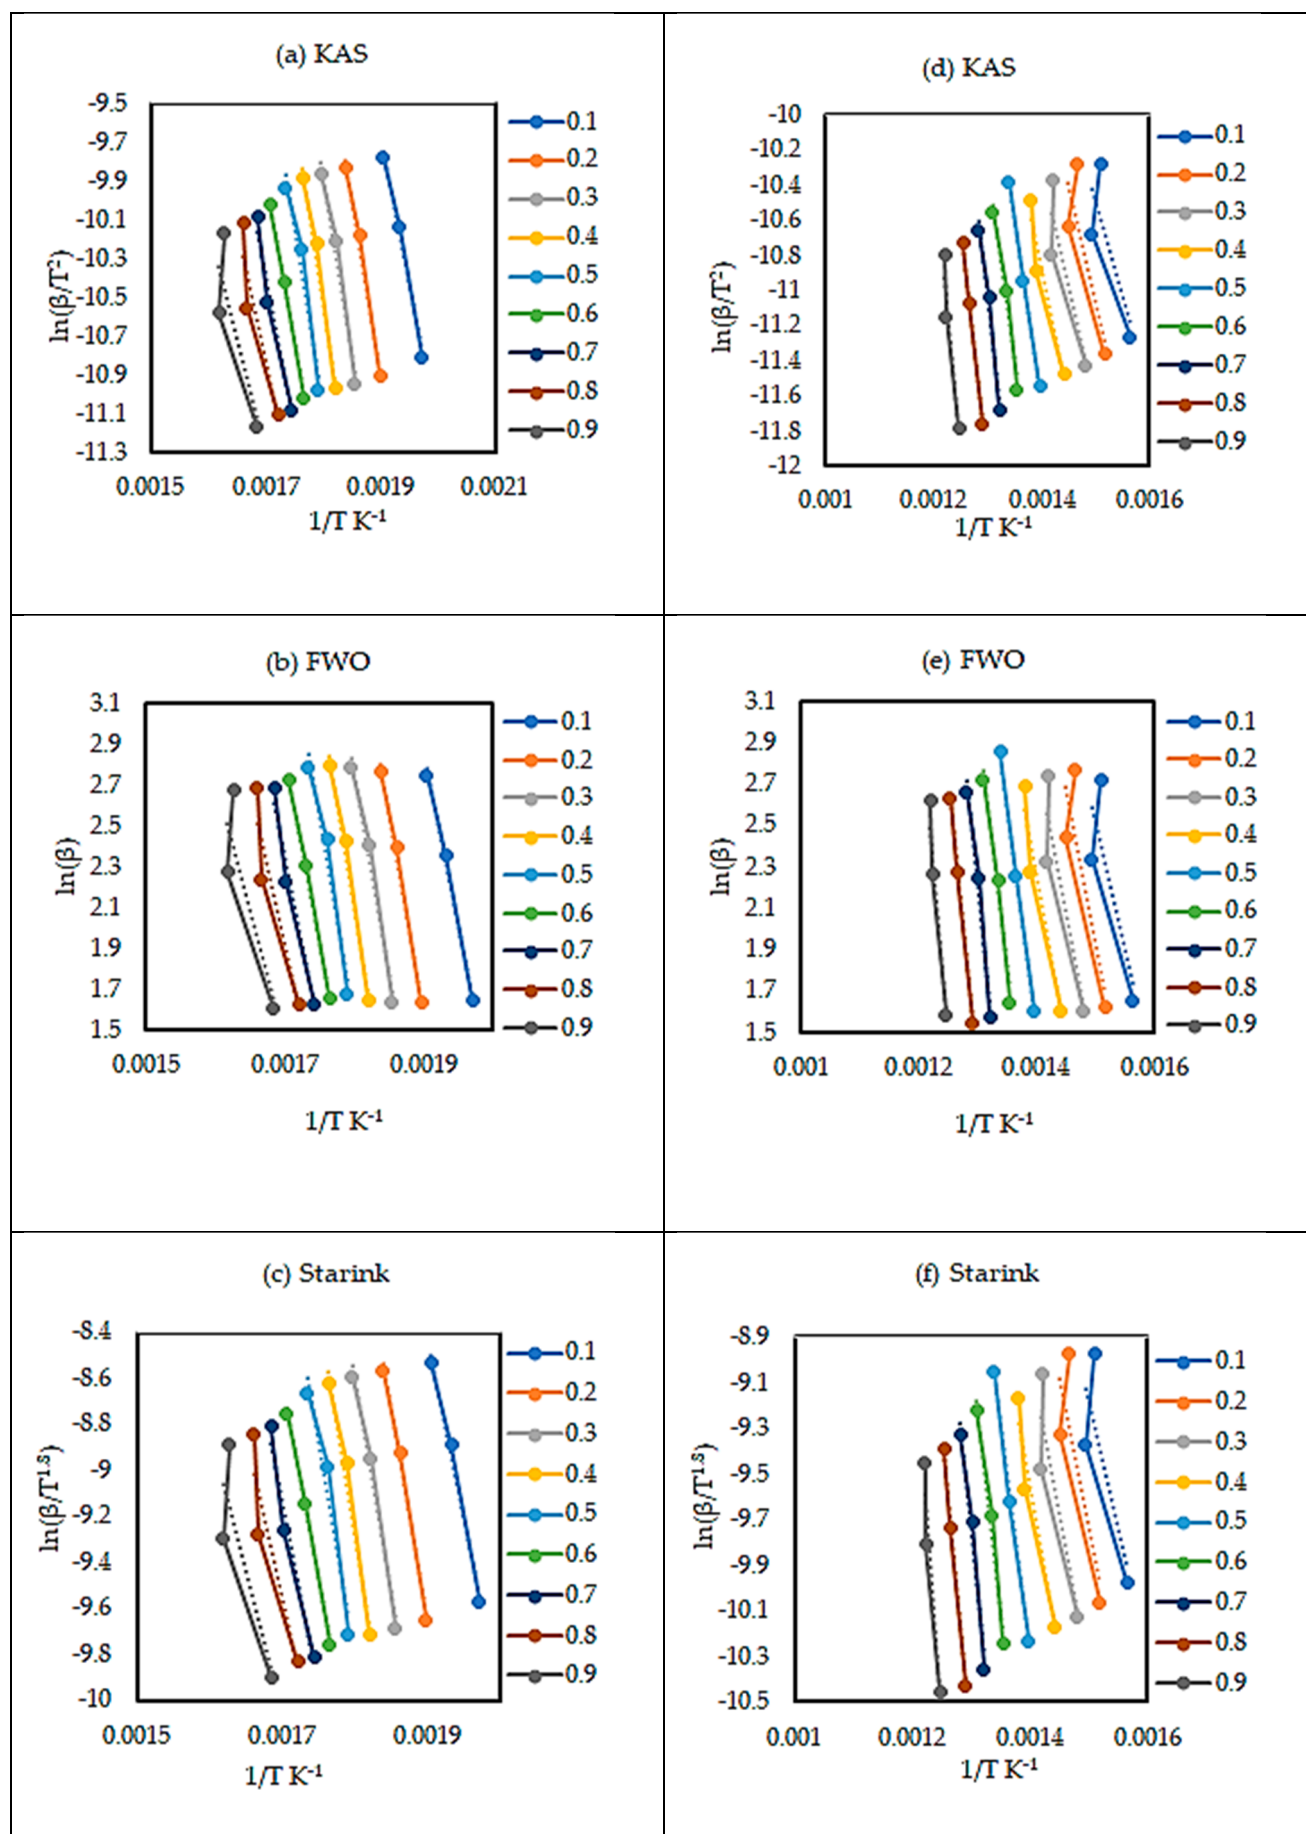

**Figure S3.** Curve fittings to kinetic model proposed by KAS, FWO and Starink for CS:WPCB 1<sup>st</sup> (a,b,c) and 2<sup>nd</sup> (d,e,f) Zone.
